# Supplementary material
Source: PubMed Central journal article supplement (PMC9021323)
Supplement: NIHMS1750751-supplement-1.pdf [file NIHMS1750751-supplement-1.pdf]

## Supplementary Table S1

Nanostring nCounter™ profiling of isogenic malignant melanoma cells:  
Gene expression changes in BRAF<sup>V600E</sup>/NRAS<sup>Q61K</sup> relative to BRAF<sup>V600E</sup>/NRAS<sup>Q61</sup>

| gene          | description                                         | fold change <sup>1</sup> | p value |
|---------------|-----------------------------------------------------|--------------------------|---------|
| <i>ITGA1</i>  | integrin subunit alpha 1                            | 31.78                    | 0.00001 |
| <i>ITGA7</i>  | integrin subunit alpha 7                            | 13.64                    | 0.00046 |
| <i>FNI</i>    | fibronectin                                         | 10.56                    | 0.00007 |
| <i>PDGFRB</i> | platelet derived growth factor receptor beta        | 9.38                     | 0.00051 |
| <i>MEOX2</i>  | mesenchyme homeobox 2                               | 8.00                     | 0.00013 |
| <i>COL6A2</i> | collagen type VI alpha 2 chain                      | 7.52                     | 0.00025 |
| <i>FHL1</i>   | four and a half LIM domains protein 1               | 6.23                     | 0.00007 |
| <i>TNC</i>    | tenascin C                                          | 5.94                     | 0.00005 |
| <i>CHRD1</i>  | chordin like 1                                      | 5.78                     | 0.00041 |
| <i>COL6A1</i> | collagen type VI alpha 1 chain                      | 5.62                     | 0.00015 |
| <i>GSN</i>    | gelsolin                                            | 5.46                     | 0.00001 |
| <i>ITGB3</i>  | integrin subunit beta 3                             | 5.24                     | 0.00005 |
| <i>RAMP1</i>  | receptor activity modifying protein 1               | 5.13                     | 0.00019 |
| <i>SRPX2</i>  | sushi repeat containing protein X-linked 2          | 5.13                     | 0.00035 |
| <i>LAMA5</i>  | laminin subunit alpha 5                             | 5.10                     | 0.00030 |
| <i>TWIST1</i> | twist basic helix-loop-helix transcription factor 1 | 5.03                     | 0.00026 |
| <i>CLDN4</i>  | claudin 4                                           | 4.26                     | 0.00060 |
| <i>HEG1</i>   | heart development protein with EGF like domains 1   | 4.23                     | 0.00011 |
| <i>CXCL8</i>  | C-X-C motif chemokine ligand 8                      | 4.17                     | 0.00013 |
| <i>GJA5</i>   | gap junction protein alpha 5                        | 4.03                     | 0.00120 |
| <i>JUN</i>    | Jun proto-oncogene                                  | -4.04                    | 0.00073 |
| <i>AREG</i>   | amphiregulin                                        | -7.73                    | 0.00117 |
| <i>HMOX1</i>  | heme oxygenase 1                                    | -15.44                   | 0.00001 |

<sup>1</sup> expression changes (fold change  $\geq 4$ ; Benjamini-Yekutieli adjusted *p* value) as displayed by heatmap depiction in Figure 1b
